# Supplementary material
Source: PubMed Central journal article supplement (PMC3138640)
Supplement: supp_jn.111.138925_nut_138925_T1-T6.pdf [file supp_jn.111.138925_nut_138925_T1-T6.pdf]

## Online Supplemental Material

### Supplemental TABLE 1 Participant characteristics and baseline blood chemistry

| ID, sex                   | Participant characteristics |             |                         |            | Plasma cholesterol / triglyceride |               |               | Plasma $\alpha$ -tocopherol |                   |                   | RBC $\alpha$ -tocopherol |                   |                   |
|---------------------------|-----------------------------|-------------|-------------------------|------------|-----------------------------------|---------------|---------------|-----------------------------|-------------------|-------------------|--------------------------|-------------------|-------------------|
|                           | age                         | weight      | BMI                     | PCV        | HDL-chol                          | LDL-chol      | TG            | -14 d                       | -7 d              | 0 d               | -14 d                    | -7 d              | 0 d               |
|                           | <i>y</i>                    | <i>kg</i>   | <i>kg/m<sup>2</sup></i> | <i>%</i>   | <i>mmol/L</i>                     | <i>mmol/L</i> | <i>mmol/L</i> | $\mu\text{mol/L}$           | $\mu\text{mol/L}$ | $\mu\text{mol/L}$ | $\mu\text{mol/L}$        | $\mu\text{mol/L}$ | $\mu\text{mol/L}$ |
| 2, F                      | 25                          | 50          | 19                      | 40         | 2.0                               | 1.9           | 0.7           | 30                          | 28                | 23                | 4.2                      | 3.0               | 3.1               |
| 3, F                      | 23                          | 58          | 20                      | 37         | 1.4                               | 3.4           | 0.9           | 25                          | 24                | 25                | 2.5                      | 1.4               | 2.4               |
| 4, M                      | 22                          | 75          | 23                      | 39         | 1.6                               | 2.8           | 0.5           | 21                          | 19                | 20                | 3.8                      | 2.7               | 2.9               |
| 5, M                      | 23                          | 84          | 24                      | 39         | 1.0                               | 3.0           | 1.5           | 25                          | 25                | 22                | 3.3                      | 2.7               | 2.9               |
| 6, F                      | 26                          | 59          | 21                      | 44         | 1.5                               | 3.2           | 1.5           | 20                          | 19                | 17                | 3.1                      | 2.9               | 3.0               |
| 7, M                      | 25                          | 70          | 22                      | 46         | 1.0                               | 2.5           | 0.5           | 21                          | 21                | 20                | 3.2                      | 2.4               | 2.2               |
| 8, M                      | 39                          | 78          | 22                      | 44         | 1.2                               | 3.2           | 1.2           | 24                          | 24                | 24                | 3.8                      | 3.8               | 3.3               |
| 9, M                      | 32                          | 78          | 25                      | 44         | 1.0                               | 3.0           | 0.7           | 20                          | 22                | 17                | 2.9                      | 3.0               | 2.6               |
| 10, M                     | 23                          | 77          | 23                      | 40         | 1.1                               | 2.9           | 0.8           | 22                          | 25                | 20                | 2.6                      | 2.5               | 2.5               |
| 11, F                     | 29                          | 59          | 21                      | 40         | 2.1                               | 2.3           | 0.8           | 27                          | 26                | 22                | 2.6                      | 2.4               | 2.2               |
| 12, F                     | 39                          | 57          | 20                      | 39         | 1.7                               | 3.2           | 0.6           | 23                          | 25                | 25                | 2.6                      | 2.0               | 2.2               |
| 13, F                     | 19                          | 59          | 21                      | 37         | 1.9                               | 3.4           | 1.3           | 26                          | 25                | 25                | 3.3                      | 2.5               | 2.3               |
| $\bar{x} \pm \text{SD}^1$ | 27 $\pm$ 7                  | 67 $\pm$ 11 | 22 $\pm$ 2              | 41 $\pm$ 3 | 1.5 $\pm$ 0.4                     | 2.9 $\pm$ 0.5 | 0.9 $\pm$ 0.4 | 24 $\pm$ 3                  | 24 $\pm$ 3        | 22 $\pm$ 3        | 3.2 $\pm$ 0.6            | 2.6 $\pm$ 0.6     | 2.6 $\pm$ 0.4     |

<sup>1</sup>Data are presented as mean  $\pm$  SD. Abbreviations used: BMI, body mass index; Chol, cholesterol; PCV, packed cell volume; TG, triglyceride

## Online Supplemental Material

### Supplemental TABLE 2 Dietary intake assessed by food frequency questionnaire

| Food frequency questionnaire |             |            |            |            |            |            |            |            |            |             |             |             |             |
|------------------------------|-------------|------------|------------|------------|------------|------------|------------|------------|------------|-------------|-------------|-------------|-------------|
| ID, sex                      | Energy      | Protein    | Fiber      | Total fat  | Sat fat    | Mono fat   | Poly fat   | Trans fat  | n-3 fat    | CHOL        | α-TOC       | Vit C       | Selenium    |
|                              | <i>MJ/d</i> | <i>g/d</i> | <i>mg/d</i> | <i>mg/d</i> | <i>mg/d</i> | <i>μg/d</i> |
| 2, F                         | 6.9         | 58         | 21         | 57         | 17         | 21         | 14         | 2          | 2          | 173         | 7.4         | 83.0        | 99.1        |
| 3, F                         | 6.6         | 64         | 14         | 59         | 18         | 24         | 13         | 2          | 1          | 157         | 6.4         | 91.2        | 90.9        |
| 4, M                         | 10          | 97         | 12         | 79         | 31         | 31         | 11         | 3          | 1          | 271         | 5.3         | 53.6        | 120         |
| 5, M                         | 17          | 135        | 27         | 167        | 56         | 64         | 34         | 8          | 3          | 392         | 15          | 107         | 163         |
| 6, F                         | 7.8         | 85         | 20         | 72         | 27         | 27         | 13         | 2          | 2          | 267         | 6.8         | 77.3        | 108         |
| 7, M                         | 9.1         | 89         | 18         | 83         | 32         | 30         | 14         | 3          | 1          | 289         | 6.9         | 57.5        | 109         |
| 8, M                         | 12          | 93         | 25         | 122        | 45         | 46         | 22         | 4          | 2          | 383         | 11          | 105         | 129         |
| 9, M                         | 5.5         | 67         | 10         | 60         | 18         | 21         | 15         | 2          | 1          | 275         | 5.0         | 78.5        | 275         |
| 10, M                        | 10          | 95         | 15         | 98         | 34         | 37         | 19         | 4          | 2          | 286         | 7.5         | 67.4        | 117         |
| 11, F                        | 7.4         | 69         | 15         | 75         | 19         | 32         | 18         | 1          | 2          | 241         | 8.5         | 129         | 78.1        |
| 12, F                        | 5.8         | 59         | 15         | 62         | 22         | 24         | 12         | 2          | 1          | 248         | 6.5         | 81.4        | 75.5        |
| 13, F                        | 6.8         | 55         | 18         | 52         | 18         | 20         | 10         | 2          | 2          | 157         | 5.4         | 82.8        | 85.9        |
| $\bar{x} \pm SD^1$           | 8.8 ± 3.2   | 81 ± 23    | 18 ± 5     | 82 ± 33    | 27 ± 14    | 31 ± 13    | 16 ± 7     | 3 ± 2      | 2 ± 1      | 233 ± 90    | 7.6 ± 2.8   | 84.4 ± 21.4 | 121 ± 54    |

<sup>1</sup>Data are presented as mean ± SD. Abbreviations used: Sat Fat, saturated fat; Mono Fat, mono unsaturated fat; Poly Fat, polyunsaturated fat; n-3 fat, n-3 fatty acid; CHOL, cholesterol; vit C, vitamin C

## Online Supplemental Material

### Supplemental TABLE 3 Mass balance and retention of ingested <sup>14</sup>C over the first 21 d since dosing

| ID, sex                                | Endogenous and total urine <sup>14</sup> C eliminated |                     |                    | Fecal, metabolic fecal, and total <sup>14</sup> C eliminated |                     |                    | Absorption            |                   | Mass Balance                  |                             |
|----------------------------------------|-------------------------------------------------------|---------------------|--------------------|--------------------------------------------------------------|---------------------|--------------------|-----------------------|-------------------|-------------------------------|-----------------------------|
|                                        | 0-3 d<br>% of dose                                    | 4-21 d<br>% of dose | Total<br>% of dose | 0-3 d<br>% of dose                                           | 4-21 d<br>% of dose | Total<br>% of dose | Apparent<br>% of dose | True<br>% of dose | Total eliminated<br>% of dose | Total retained<br>% of dose |
| 2, F                                   | 1.21                                                  | 0.34                | 1.54               | 18.0                                                         | 1.57                | 19.6               | 82.0                  | 83.5              | 21.2                          | 78.9                        |
| 3, F                                   | 6.92                                                  | 0.26                | 7.17               | 8.10                                                         | 2.04                | 10.1               | 91.9                  | 93.9              | 17.3                          | 82.7                        |
| 4, M                                   | 3.56                                                  | 0.55                | 4.11               | 22.7                                                         | 2.37                | 25.1               | 77.3                  | 79.6              | 29.2                          | 70.8                        |
| 5, M                                   | 2.70                                                  | 0.47                | 3.17               | 26.7                                                         | 4.08                | 30.8               | 73.3                  | 77.4              | 34.0                          | 66.1                        |
| 6, F                                   | 3.66                                                  | 1.14                | 4.81               | 18.8                                                         | 2.96                | 21.7               | 81.2                  | 84.2              | 26.5                          | 73.5                        |
| 7, M                                   | 3.07                                                  | 0.67                | 3.74               | 20.3                                                         | 2.64                | 22.9               | 79.7                  | 82.4              | 26.7                          | 73.3                        |
| 8, M                                   | 3.36                                                  | 0.61                | 3.96               | 18.8                                                         | 3.39                | 22.2               | 81.2                  | 84.6              | 26.1                          | 73.9                        |
| 9, M                                   | 4.05                                                  | 0.22                | 4.27               | 25.5                                                         | 3.22                | 28.8               | 74.4                  | 77.6              | 33.1                          | 66.9                        |
| 10, M                                  | 3.35                                                  | 0.43                | 3.77               | 15.3                                                         | 1.72                | 17.0               | 84.8                  | 86.5              | 20.7                          | 79.3                        |
| 11, F                                  | 3.48                                                  | 0.27                | 3.75               | 28.3                                                         | 1.02                | 29.3               | 71.7                  | 72.7              | 33.1                          | 66.9                        |
| 12, F                                  | 5.05                                                  | 0.69                | 5.73               | 22.1                                                         | 2.09                | 24.2               | 77.9                  | 80.0              | 29.9                          | 70.0                        |
| 13, F                                  | 4.58                                                  | 0.51                | 5.08               | 25.1                                                         | 2.06                | 27.1               | 74.9                  | 77.0              | 32.2                          | 67.8                        |
| $\bar{x} \pm SD^1$                     | 3.75 ±1.38                                            | 0.51 ±0.25          | 4.26 ±1.38         | 20.8 ±5.6                                                    | 2.43 ±0.87          | 23.2 ±5.8          | 79.2 ±5.6             | 81.6 ±5.5         | 27.5 ±5.2                     | 72.5 ±5.5                   |
| Prior studies <sup>(Ref)</sup>         |                                                       |                     |                    |                                                              |                     |                    |                       |                   |                               |                             |
| RRR- $\alpha$ -Toc <sup>(26)</sup>     | 3.97                                                  | 2.35                | 6.32               | 24.7                                                         | 3.11                | 27.9               | 75.3                  | 78.4              | 34.1                          | 65.8                        |
| all-rac- $\alpha$ -Toc <sup>(26)</sup> | 11.6                                                  | 4.98                | 16.5               | 24.5                                                         | 6.94                | 31.5               | 75.5                  | 82.4              | 48.0                          | 60.4                        |
| all-rac- $\alpha$ -Toc <sup>(28)</sup> | < 6.00                                                | -                   | < 6.00             | -                                                            | -                   | 27.6*              | 72.4                  | -                 | 33.6                          | 66.4                        |
| all-rac- $\alpha$ -Toc <sup>(29)</sup> | 8.21                                                  | -                   | 8.21               | -                                                            | -                   | 31.4*              | 68.6                  | -                 | 39.6                          | 52.0                        |

<sup>1</sup>Data are presented as mean  $\pm$  SD. \*Duration of fecal collections was  $\leq$  12 d

**Online Supplemental Material**

**Supplemental TABLE 4**  $^{14}\text{C}$  concentration maxima ( $C_{\text{max}}$ ) and time to maxima ( $T_{\text{max}}$ ) in plasma, red blood cells, urine and feces

| ID, sex                   | Plasma                               |                           | RBC                               |                           | Urine                                  |                       | Feces                                  |                       |
|---------------------------|--------------------------------------|---------------------------|-----------------------------------|---------------------------|----------------------------------------|-----------------------|----------------------------------------|-----------------------|
|                           | $C_{\text{max}}$<br>% dose/ L plasma | $T_{\text{max}}$<br>d     | $C_{\text{max}}$<br>% dose/ L RBC | $T_{\text{max}}$<br>d     | $C_{\text{max}}$<br>% dose/ collection | $T_{\text{max}}$<br>d | $C_{\text{max}}$<br>% dose/ collection | $T_{\text{max}}$<br>d |
| 2, F                      | 7.17                                 | 0.49                      | 1.75                              | 1.00                      | 0.19                                   | 2.00                  | 7.81                                   | 1.04                  |
| 3, F                      | 5.63                                 | 0.49                      | 1.77                              | 0.83                      | 1.85                                   | 3.00                  | 6.63                                   | 3.47                  |
| 4, M                      | 3.75                                 | 0.50                      | 1.89                              | 0.92                      | 1.03                                   | 1.25                  | 14.1                                   | 2.27                  |
| 5, M                      | 3.44                                 | 0.75                      | 1.89                              | 0.83                      | 0.71                                   | 0.25                  | 13.4                                   | 1.19                  |
| 6, F                      | 7.70                                 | 0.42                      | 1.75                              | 0.92                      | 0.72                                   | 0.50                  | 8.12                                   | 1.97                  |
| 7, M                      | 5.09                                 | 0.42                      | 1.49                              | 0.92                      | 0.51                                   | 3.00                  | 10.0                                   | 2.99                  |
| 8, M                      | 3.49                                 | 0.83                      | 0.92                              | 0.92                      | 0.49                                   | 0.50                  | 8.91                                   | 2.13                  |
| 9, M                      | 5.89                                 | 0.50                      | 1.36                              | 0.92                      | 0.52                                   | 3.00                  | 10.2                                   | 2.99                  |
| 10, M                     | 4.32                                 | 0.83                      | 1.60                              | 0.83                      | 0.49                                   | 0.50                  | 4.43                                   | 1.60                  |
| 11, F                     | 4.37                                 | 0.38                      | 1.12                              | 1.00                      | 0.73                                   | 0.50                  | 16.3                                   | 1.21                  |
| 12, F                     | 6.02                                 | 0.75                      | 1.66                              | 0.92                      | 0.68                                   | 2.00                  | 7.84                                   | 2.43                  |
| 13, F                     | 7.83                                 | 0.58                      | 1.87                              | 1.33                      | 0.67                                   | 0.50                  | 14.7                                   | 2.15                  |
| $\bar{x} \pm \text{SD}^1$ | 5.39±1.58                            | 0.58 ±0.17                | 1.59±0.31                         | 0.94±0.13                 | 0.72±0.41                              | 1.42±1.12             | 10.2±3.6                               | 2.12 ±0.77            |
| Priors <sup>(Ref)</sup>   | 5.92±1.90 <sup>(21)</sup>            | 0.53±0.24 <sup>(21)</sup> | 1.09±0.32 <sup>(21)</sup>         | 1.06±0.41 <sup>(21)</sup> | -                                      | -                     | -                                      | -                     |

<sup>1</sup>Data are presented as mean ± SD

## Online Supplemental Material

### Supplemental TABLE 5 Effects of study duration on plasma and RBC RRR- $\alpha$ -tocopherol area under the curve

| Plasma             |                            |                                      |                            |                                      |                            |                                      |                             |                                       |                              |                                        |
|--------------------|----------------------------|--------------------------------------|----------------------------|--------------------------------------|----------------------------|--------------------------------------|-----------------------------|---------------------------------------|------------------------------|----------------------------------------|
| ID, sex            | 0-2 d                      |                                      | 0-4 d                      |                                      | 0-5 d                      |                                      | 0-70 d                      |                                       | 0-460 d                      |                                        |
|                    | $t_{1/2}$ 0-2<br>%dose/L•d | $t_{1/2}$ 0-2, $\infty$<br>%dose/L•d | $t_{1/2}$ 0-4<br>%dose/L•d | $t_{1/2}$ 0-4, $\infty$<br>%dose/L•d | $t_{1/2}$ 0-5<br>%dose/L•d | $t_{1/2}$ 0-5, $\infty$<br>%dose/L•d | $t_{1/2}$ 0-70<br>%dose/L•d | $t_{1/2}$ 0-70, $\infty$<br>%dose/L•d | $t_{1/2}$ 0-460<br>%dose/L•d | $t_{1/2}$ 0-460, $\infty$<br>%dose/L•d |
| 2, F               | 9.84                       | 17.4                                 | 14.5                       | 18.6                                 | 15.9                       | 20.4                                 | 27.1                        | 29.7                                  | 42.4                         | 46.3                                   |
| 3, F               | 7.85                       | 13.2                                 | 10.1                       | 14.3                                 | 12.8                       | 15.3                                 | -                           | -                                     | -                            | -                                      |
| 4, M               | 5.50                       | 8.78                                 | 8.17                       | 11.0                                 | 8.97                       | 11.1                                 | 16.6                        | 17.9                                  | 30.7                         | 34.0                                   |
| 5, M               | 5.38                       | 10.2                                 | 8.27                       | 10.7                                 | 9.14                       | 11.6                                 | 16.8                        | 20.3                                  | 27.6                         | 31.1                                   |
| 6, F               | 13.2                       | 22.9                                 | 17.3                       | 22.9                                 | 19.1                       | 25.1                                 | 35.5                        | 41.5                                  | 58.5                         | 69.1                                   |
| 7, M               | 9.57                       | 24.7                                 | 13.2                       | 17.2                                 | 14.7                       | 18.4                                 | 30.6                        | 31.7                                  | 43.1                         | 46.1                                   |
| 8, M               | 6.48                       | 14.1                                 | 8.73                       | 11.7                                 | 9.64                       | 11.9                                 | 18.1                        | 20.6                                  | 29.6                         | 31.0                                   |
| 9, M               | 9.57                       | 17.5                                 | 12.7                       | 17.1                                 | 14.1                       | 17.3                                 | 24.2                        | 29.5                                  | 35.4                         | 35.6                                   |
| 10, M              | 7.92                       | 19.3                                 | 10.6                       | 14.1                                 | 11.8                       | 15.6                                 | 21.8                        | 25.3                                  | 33.7                         | 38.6                                   |
| 11, F              | 6.41                       | 9.29                                 | 7.93                       | 9.26                                 | 8.54                       | 10.2                                 | 14.0                        | 16.5                                  | 24.5                         | 36.1                                   |
| 12, F              | 10.4                       | 20.5                                 | 13.7                       | 17.5                                 | 15.1                       | 18.5                                 | 26.5                        | 30.5                                  | 41.7                         | 45.7                                   |
| 13, F              | 13.3                       | 27.8                                 | 17.7                       | 24.9                                 | 19.7                       | 27.5                                 | 35.5                        | 40.2                                  | -                            | -                                      |
| $\bar{x} \pm SD^1$ | 8.78 $\pm$ 2.68            | 17.1 $\pm$ 6.0                       | 11.9 $\pm$ 3.3             | 15.8 $\pm$ 4.7                       | 13.3 $\pm$ 3.7             | 16.9 $\pm$ 5.3                       | 24.2 $\pm$ 7.5              | 27.6 $\pm$ 8.4                        | 36.7 $\pm$ 9.5               | 41.6 $\pm$ 10.7                        |

  

| RBC                |                            |                                      |                            |                                      |                            |                                      |                             |                                       |                              |                                        |
|--------------------|----------------------------|--------------------------------------|----------------------------|--------------------------------------|----------------------------|--------------------------------------|-----------------------------|---------------------------------------|------------------------------|----------------------------------------|
| ID, sex            | 0-2 d                      |                                      | 0-4 d                      |                                      | 0-5 d                      |                                      | 0-70 d                      |                                       | 0-460 d                      |                                        |
|                    | $t_{1/2}$ 0-2<br>%dose/L•d | $t_{1/2}$ 0-2, $\infty$<br>%dose/L•d | $t_{1/2}$ 0-4<br>%dose/L•d | $t_{1/2}$ 0-4, $\infty$<br>%dose/L•d | $t_{1/2}$ 0-5<br>%dose/L•d | $t_{1/2}$ 0-5, $\infty$<br>%dose/L•d | $t_{1/2}$ 0-70<br>%dose/L•d | $t_{1/2}$ 0-70, $\infty$<br>%dose/L•d | $t_{1/2}$ 0-460<br>%dose/L•d | $t_{1/2}$ 0-460, $\infty$<br>%dose/L•d |
| 2, F               | 2.68                       | 1.93                                 | 4.92                       | 6.75                                 | 6.34                       | 8.06                                 | 17.6                        | 21.5                                  | 70.0                         | 140                                    |
| 3, F               | 2.37                       | 5.78                                 | 3.38                       | 5.36                                 | 4.39                       | 4.94                                 | -                           | -                                     | -                            | -                                      |
| 4, M               | 2.23                       | 4.20                                 | 3.09                       | 5.96                                 | 4.25                       | 5.28                                 | 14.9                        | 19.8                                  | 40.2                         | 46.1                                   |
| 5, M               | 2.37                       | 5.34                                 | 4.02                       | 6.20                                 | 4.68                       | 6.30                                 | 18.0                        | 20.2                                  | 43.2                         | 56.2                                   |
| 6, F               | 3.15                       | 9.57                                 | 4.45                       | 6.94                                 | 5.17                       | 6.47                                 | 19.4                        | 61.8                                  | 78.0                         | 154                                    |
| 7, M               | 2.71                       | 5.26                                 | 3.61                       | 5.05                                 | 4.13                       | 5.67                                 | 14.3                        | 35.5                                  | 44.7                         | 58.4                                   |
| 8, M               | 1.15                       | 3.11                                 | 1.93                       | 3.95                                 | 2.30                       | 3.23                                 | -                           | -                                     | 10.8                         | 14.7                                   |
| 9, M               | 2.44                       | 5.81                                 | 3.64                       | 4.52                                 | 3.83                       | 4.79                                 | 7.82                        | 8.19                                  | 13.0                         | 13.8                                   |
| 10, M              | 2.72                       | 8.89                                 | 3.72                       | 5.37                                 | 4.25                       | 5.50                                 | 13.3                        | 51.2                                  | 41.7                         | 58.8                                   |
| 11, F              | 1.97                       | 4.49                                 | 2.27                       | 3.40                                 | 2.92                       | 3.47                                 | 9.84                        | 35.7                                  | 30.3                         | 39.7                                   |
| 12, F              | 2.66                       | 5.78                                 | 3.71                       | 5.70                                 | 4.32                       | 6.50                                 | 16.42                       | 55.1                                  | 52.3                         | 56.9                                   |
| 13, F              | 3.45                       | 6.04                                 | 4.65                       | 6.04                                 | 5.27                       | 6.50                                 | 14.56                       | 19.7                                  | -                            | -                                      |
| $\bar{x} \pm SD^1$ | 2.49 $\pm$ 0.58            | 5.52 $\pm$ 2.04                      | 3.62 $\pm$ 0.85            | 5.44 $\pm$ 1.03                      | 4.32 $\pm$ 1.01            | 5.56 $\pm$ 1.30                      | 14.6 $\pm$ 3.6              | 32.9 $\pm$ 18.0                       | 42.4 $\pm$ 21.5              | 63.8 $\pm$ 47.0                        |

<sup>1</sup>Data are presented as mean  $\pm$  SD

## Online Supplemental Material

### Supplemental TABLE 6 Effects of study duration on plasma and red blood cell RRR- $\alpha$ -tocopherol half-lives<sup>1</sup>

| ID, sex                 | Plasma                    |                                   |                           |                                   |                           |                                   |                            |                                    |                             |                                     |
|-------------------------|---------------------------|-----------------------------------|---------------------------|-----------------------------------|---------------------------|-----------------------------------|----------------------------|------------------------------------|-----------------------------|-------------------------------------|
|                         | 0-2 d                     |                                   | 0-4 d                     |                                   | 0-5 d                     |                                   | 0-70 d                     |                                    | 0-460 d                     |                                     |
|                         | $t_{1/2} 0-2$<br><i>d</i> | $t_{1/2} 0-2, \infty$<br><i>d</i> | $t_{1/2} 0-4$<br><i>d</i> | $t_{1/2} 0-4, \infty$<br><i>d</i> | $t_{1/2} 0-5$<br><i>d</i> | $t_{1/2} 0-5, \infty$<br><i>d</i> | $t_{1/2} 0-70$<br><i>d</i> | $t_{1/2} 0-70, \infty$<br><i>d</i> | $t_{1/2} 0-460$<br><i>d</i> | $t_{1/2} 0-460, \infty$<br><i>d</i> |
| 2, F                    | 0.67                      | 1.67                              | 1.09                      | 1.84                              | 1.27                      | 2.31                              | 6.68                       | 12.9                               | 39.5                        | 80.8                                |
| 3, F                    | 0.68                      | 1.53                              | 0.91                      | 1.74                              | 1.26                      | 1.92                              | -                          | -                                  | -                           | -                                   |
| 4, M                    | 0.68                      | 1.42                              | 1.11                      | 2.07                              | 1.29                      | 2.11                              | 8.28                       | 12.4                               | 56.6                        | 129                                 |
| 5, M                    | 0.73                      | 1.80                              | 1.16                      | 1.94                              | 1.35                      | 2.31                              | 7.55                       | 24.3                               | 46.7                        | 102                                 |
| 6, F                    | 0.80                      | 1.98                              | 1.13                      | 1.99                              | 1.32                      | 2.46                              | 7.95                       | 20.7                               | 51.4                        | 129                                 |
| 7, M                    | 0.86                      | 3.31                              | 1.22                      | 1.95                              | 1.41                      | 2.23                              | 8.02                       | 9.75                               | 34.5                        | 64.4                                |
| 8, M                    | 0.86                      | 2.71                              | 1.20                      | 2.08                              | 1.38                      | 2.16                              | 7.38                       | 15.8                               | 34.5                        | 52.7                                |
| 9, M                    | 0.83                      | 2.10                              | 1.17                      | 2.06                              | 1.35                      | 2.11                              | 7.04                       | 26.8                               | 23.4                        | 26.0                                |
| 10, M                   | 0.85                      | 3.17                              | 1.19                      | 2.06                              | 1.37                      | 2.54                              | 7.49                       | 20.8                               | 45.5                        | 106                                 |
| 11, F                   | 0.73                      | 1.44                              | 1.01                      | 1.45                              | 1.16                      | 1.87                              | 7.44                       | 21.4                               | 65.3                        | 273                                 |
| 12, F                   | 0.83                      | 2.37                              | 1.15                      | 1.87                              | 1.33                      | 2.12                              | 7.45                       | 19.3                               | 43.0                        | 84.3                                |
| 13, F                   | 0.80                      | 2.67                              | 1.15                      | 2.27                              | 1.35                      | 2.80                              | 6.76                       | 17.6                               | -                           | -                                   |
| $\bar{x} \pm SD^1$      | $0.78 \pm 0.07$           | $2.18 \pm 0.66$                   | $1.12 \pm 0.09$           | $1.95 \pm 0.21$                   | $1.32 \pm 0.07$           | $2.24 \pm 0.26$                   | $7.46 \pm 0.50$            | $18.3 \pm 5.2$                     | $44.0 \pm 12.0$             | $105 \pm 67$                        |
| Priors <sup>(Ref)</sup> | -                         | $2.15 \pm 0.73^{(20)}$            | -                         | $1.83 \pm 0.78^{(22)}$            | -                         | -                                 | -                          | -                                  | -                           | -                                   |
|                         | -                         | $1.79 \pm 0.88^{(21)}$            | -                         | $3.36 \pm 0.80^{(23)}$            | -                         | -                                 | -                          | -                                  | -                           | -                                   |

  

| ID, sex                 | RBC                       |                                   |                           |                                   |                           |                                   |                            |                                    |                             |                                     |
|-------------------------|---------------------------|-----------------------------------|---------------------------|-----------------------------------|---------------------------|-----------------------------------|----------------------------|------------------------------------|-----------------------------|-------------------------------------|
|                         | 0-2 d                     |                                   | 0-4 d                     |                                   | 0-5 d                     |                                   | 0-70 d                     |                                    | 0-460 d                     |                                     |
|                         | $t_{1/2} 0-2$<br><i>d</i> | $t_{1/2} 0-2, \infty$<br><i>d</i> | $t_{1/2} 0-4$<br><i>d</i> | $t_{1/2} 0-4, \infty$<br><i>d</i> | $t_{1/2} 0-5$<br><i>d</i> | $t_{1/2} 0-5, \infty$<br><i>d</i> | $t_{1/2} 0-70$<br><i>d</i> | $t_{1/2} 0-70, \infty$<br><i>d</i> | $t_{1/2} 0-460$<br><i>d</i> | $t_{1/2} 0-460, \infty$<br><i>d</i> |
| 2, F                    | 0.80                      | 2.00                              | 1.49                      | 2.73                              | 1.98                      | 3.45                              | 15.0                       | 26.6                               | 185                         | 392                                 |
| 3, F                    | 0.82                      | 2.46                              | 1.05                      | 2.07                              | 1.28                      | 1.68                              | -                          | -                                  | -                           | -                                   |
| 4, M                    | 0.75                      | 1.76                              | 1.23                      | 2.48                              | 1.43                      | 2.24                              | 14.5                       | 31.0                               | 66.1                        | 125                                 |
| 5, M                    | 0.80                      | 2.13                              | 1.29                      | 2.59                              | 1.50                      | 2.62                              | 17.5                       | 22.7                               | 93.2                        | 195                                 |
| 6, F                    | 0.93                      | 3.81                              | 1.29                      | 2.60                              | 1.49                      | 2.27                              | 18.2                       | 145                                | 115                         | 455                                 |
| 7, M                    | 0.89                      | 2.27                              | 1.23                      | 2.22                              | 1.44                      | 2.61                              | 16.6                       | 111                                | 84.7                        | 196                                 |
| 8, M                    | 0.87                      | 2.96                              | 1.34                      | 3.75                              | 1.57                      | 2.89                              | -                          | -                                  | 140                         | 220                                 |
| 9, M                    | 0.93                      | 2.90                              | 1.26                      | 2.30                              | 1.45                      | 2.27                              | 7.83                       | 10.2                               | 39.3                        | 64                                  |
| 10, M                   | 0.95                      | 4.27                              | 1.28                      | 2.37                              | 1.47                      | 2.42                              | 15.6                       | 220                                | 88.4                        | 234                                 |
| 11, F                   | 0.87                      | 2.78                              | 1.18                      | 1.97                              | 1.35                      | 1.97                              | 16.1                       | 200                                | 82.8                        | 193                                 |
| 12, F                   | 0.89                      | 2.56                              | 1.28                      | 2.60                              | 1.52                      | 3.08                              | 17.5                       | 162                                | 62.9                        | 97                                  |
| 13, F                   | 0.95                      | 1.76                              | 1.27                      | 1.97                              | 1.45                      | 2.18                              | 13.7                       | 35.0                               | -                           | -                                   |
| $\bar{x} \pm SD^1$      | $0.87 \pm 0.07$           | $2.64 \pm 0.78$                   | $1.26 \pm 0.10$           | $2.47 \pm 0.46$                   | $1.50 \pm 0.17$           | $2.48 \pm 0.49$                   | $15.2 \pm 3.0$             | $96.2 \pm 80.6$                    | $95.7 \pm 41.9$             | $217 \pm 123$                       |
| Priors <sup>(Ref)</sup> | -                         | $2.13 \pm 0.58^{(21)}$            | -                         | $9.31 \pm 2.37^{(23)}$            | -                         | -                                 | -                          | -                                  | -                           | -                                   |

<sup>1</sup>Data are presented as mean  $\pm$  SD
